# Supplementary material for: Adolescents and young adults with sickle cell disease exhibit accelerated aging with elevated T-cell p16INK4a expression
Source: publisher site journal article supplement (doi:10.18632/aging.206152), 2024-11-14
Supplement: Supplementary file [file aging-vnull-206152-supplementary-material-SD2.pdf]

## SUPPLEMENTARY FIGURES

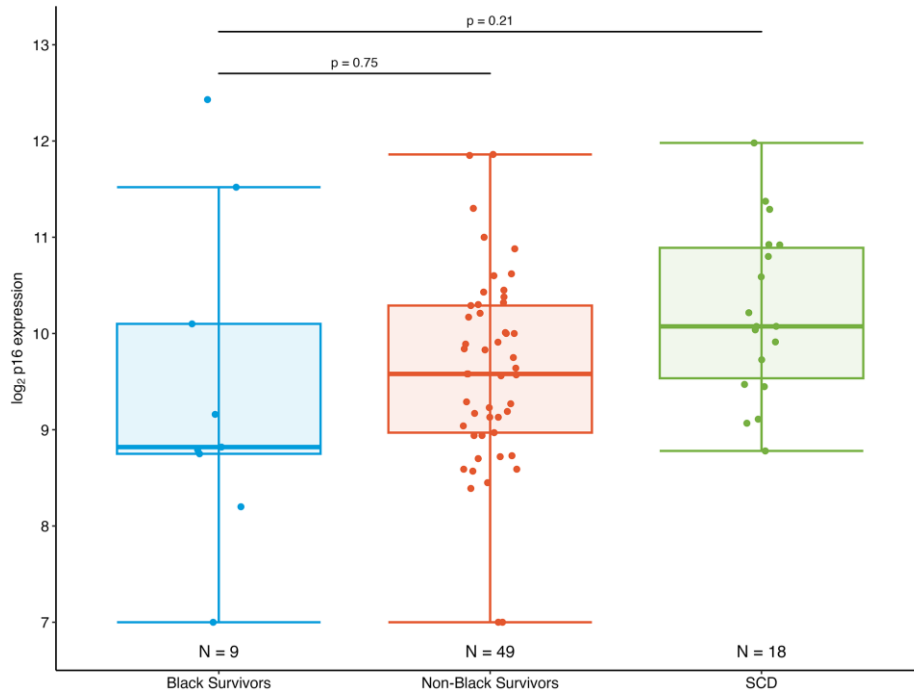

**Supplementary Figure 1.** Comparison of mean p16 expression in self-identified Black/African-American cancer survivors, non-Black survivors, and the sickle cell disease (SCD) groups show that individuals with SCD have a distinctively higher mean p16 expression (not significant). These results imply that race alone does not account for the higher mean p16 expression in SCD observed in this study.

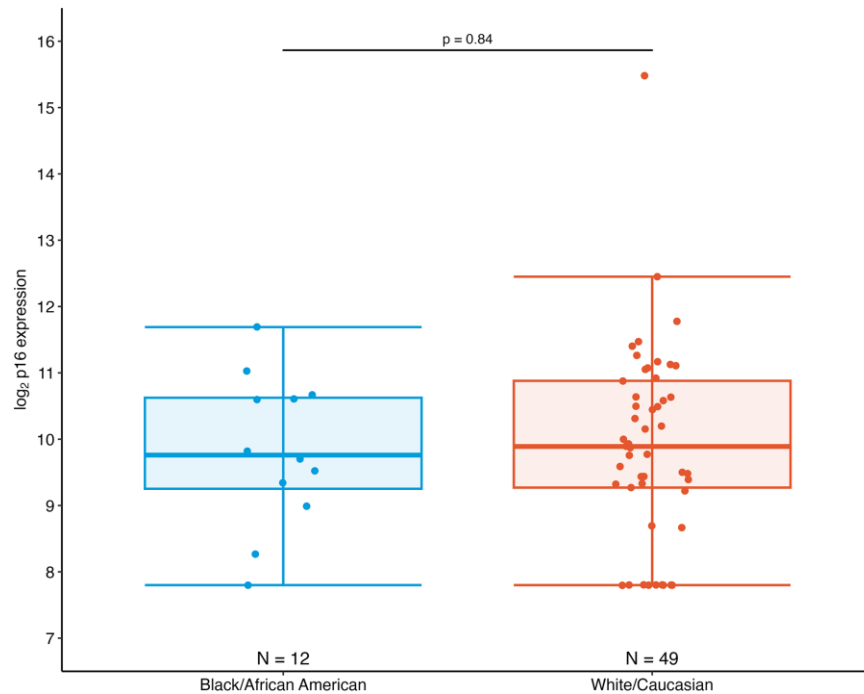

**Supplementary Figure 2.** Cross-sectional compilation of similarly aged cohort either with cancer prior to therapy or healthy comparators demonstrate no difference in p16 expression between self-identified Black/African-American and White/Caucasians.
