# Supplementary material for: Adolescents and young adults with sickle cell disease exhibit accelerated aging with elevated T-cell p16INK4a expression
Source: publisher site journal article supplement (doi:10.18632/aging.206152), 2024-11-14
Supplement: Supplementary file [file aging-vnull-206152-supplementary-material-SD3.pdf]

## SUPPLEMENTARY TABLES

**Supplementary Table 1. Extended SCD participant characteristics.**

| Characteristic                                            | Overall, <i>N</i> = 18 | Not on CTT ( <i>N</i> = 10) | On CTT ( <i>N</i> = 8) |
|-----------------------------------------------------------|------------------------|-----------------------------|------------------------|
| Age (years), median (range)                               | 22 (15–27)             | 22 (18–27)                  | 22 (15–25)             |
| Gender, <i>n</i> (%)                                      |                        |                             |                        |
| Female                                                    | 11 (61%)               | 6 (60%)                     | 5 (62%)                |
| Male                                                      | 7 (39%)                | 4 (40%)                     | 3 (38%)                |
| Genotype, <i>n</i> (%)                                    |                        |                             |                        |
| HbSS                                                      | 16 (89%)               | 9 (90%)                     | 7 (88%)                |
| HbSβ <sup>0</sup> -thalassemia                            | 2 (11%)                | 1 (10%)                     | 1 (12%)                |
| WBC count (10 <sup>9</sup> /L), median (IQR)              | 11.3 (8.2–13.8)        | 10.9 (8.1–13.3)             | 11.3 (10.2–13.8)       |
| Hemoglobin (g/dL), median (IQR)                           | 9.1 (8.7–9.6)          | 9.1 (8.5–9.2)               | 9.4 (8.9–10.0)         |
| Platelet count (10 <sup>9</sup> /L), median (IQR)         | 356 (282–477)          | 306 (181–350)               | 472 (435–554)          |
| Absolute reticulocytes (10 <sup>9</sup> /L), median (IQR) | 223 (172–281)          | 199 (164–244)               | 259 (175–290)          |
| Absolute neutrophils (10 <sup>9</sup> /L), median (IQR)   | 6.5 (4.6–8.2)          | 5.3 (3.6–7.1)               | 8.1 (6.2–8.2)          |
| Absolute lymphocytes (10 <sup>9</sup> /L), median (IQR)   | 3.05 (1.9–3.5)         | 3.25 (2.8–3.6)              | 2.2 (1.8–3.4)          |
| On hydroxyurea, <i>n</i> (%)                              | 10 (56%)               | 8 (80%)                     | 2 (25%)                |
| Hydroxyurea dose* (mg/kg), median (IQR)                   | 19 (16–21)             | 19 (18–22)                  | 16 (14–18)             |
| Time on hydroxyurea* (months), median, (IQR)              | 119 (64–140)           | 119 (50–135)                | 126 (105–147)          |
| Time on CTT (months)*, median (IQR)                       | 59 (6–120)             |                             | 59 (6–120)             |
| History of acute chest syndrome, <i>n</i> (%)             | 15 (83%)               | 8 (80%)                     | 7 (88%)                |
| History of stroke, <i>n</i> (%)                           | 4 (22%)                | 0 (0%)                      | 4 (50%)                |
| History of priapism, <i>n</i> (% of males)                | 4 (67%)                | 3 (75%)                     | 1 (50%)                |
| History of splenic sequestration, <i>n</i> (%)            | 9 (53%)                | 5 (56%)                     | 4 (50%)                |
| ASCQ-Me Measures, median (IQR)                            |                        |                             |                        |
| Emotional Impact                                          | 57 (50–64)             | 58 (56–66)                  | 54 (49–59)             |
| Pain Impact                                               | 59 (44–67)             | 67 (46–70)                  | 48 (44–61)             |
| Social Functioning Impact                                 | 61 (50–69)             | 63 (51–69)                  | 61 (47–65)             |
| Sleep Impact                                              | 55 (50–58)             | 55 (50–64)                  | 56 (42–58)             |
| Stiffness Impact                                          | 63 (49–66)             | 66 (64–70)                  | 54 (47–59)             |
| Pain Episode Frequency                                    | 52 (40–56)             | 54 (45–56)                  | 44 (34–58)             |
| Pain Episode Severity                                     | 45 (43–52)             | 45 (43–53)                  | 50 (44–52)             |
| PROMIS-29 Profile, median (IQR)                           |                        |                             |                        |
| Pain Interference                                         | 42 (42–61)             | 42 (42–56)                  | 52 (42–63)             |
| Depression/Sadness                                        | 49 (41–55)             | 41 (41–52)                  | 51 (50–56)             |
| Physical Function                                         | 48 (40–57)             | 57 (46–57)                  | 43 (40–52)             |
| Ability to Participate in Social Roles and Activities     | 52 (52–64)             | 55 (52–64)                  | 52 (47–64)             |
| Fatigue                                                   | 49 (42–57)             | 45 (34–56)                  | 49 (47–60)             |
| Anxiety/Fear                                              | 51 (40–56)             | 40 (40–56)                  | 52 (50–56)             |
| Sleep Disturbance                                         | 53 (46–58)             | 52 (46–54)                  | 53 (46–63)             |

\*Includes only participants receiving this therapy. ASCQ-Me: Adult Sickle Cell Quality of Life Measurement Information System; PROMIS: Patient-Reported Outcomes Measurement Information System; CTT: chronic transfusion therapy.

**Supplementary Table 2. Association between p16 and participant characteristics in the SCD group.**

| <b>Characteristic</b>                                       | <b>N</b> | <b>Beta</b> | <b>95% CI</b> | <b>p-value</b> |
|-------------------------------------------------------------|----------|-------------|---------------|----------------|
| Age                                                         | 18       | -0.03       | -0.17-0.12    | 0.7            |
| WBC count                                                   | 18       | 0.07        | -0.04-0.18    | 0.2            |
| Hemoglobin                                                  | 18       | 0.07        | -0.54-0.68    | 0.8            |
| Platelet count                                              | 18       | 0.00        | 0.00-0.00     | 0.5            |
| Absolute Reticulocytes                                      | 17       | 0.00        | 0.00-0.01     | 0.6            |
| Absolute Neutrophil count                                   | 18       | 0.11        | -0.04-0.25    | 0.14           |
| Absolute Lymphocyte count                                   | 18       | 0.02        | -0.35-0.39    | >0.9           |
| Total Bilirubin                                             | 18       | 0.12        | -0.07-0.30    | 0.2            |
| Creatinine                                                  | 18       | -0.24       | -1.3-0.82     | 0.6            |
| On Hydroxyurea                                              | 18       | 0.25        | -0.66-1.2     | 0.6            |
| Hydroxyurea dose                                            | 10       | -0.02       | -0.12-0.08    | 0.7            |
| Time on hydroxyurea therapy (months)                        | 10       | 0.00        | -0.02-0.01    | 0.6            |
| History of acute chest syndrome                             | 18       | 0.61        | -0.56-1.8     | 0.3            |
| History of stroke                                           | 18       | -0.48       | -1.5-0.58     | 0.4            |
| ASCQ-Me Emotional Impact                                    | 17       | -0.01       | -0.05-0.04    | 0.8            |
| ASCQ-Me Pain Impact                                         | 17       | 0.00        | -0.03-0.04    | 0.8            |
| ASCQ-Me Social Functioning Impact                           | 17       | -0.02       | -0.05-0.02    | 0.4            |
| ASCQ-Me Sleep Impact                                        | 17       | 0.01        | -0.03-0.05    | 0.6            |
| ASCQ-Me Stiffness Impact                                    | 17       | 0.00        | -0.05-0.05    | >0.9           |
| ASCQ-Me Pain Episode Frequency                              | 17       | 0.03        | -0.02-0.07    | 0.2            |
| ASCQ-Me Pain Episode Severity                               | 17       | 0.00        | -0.05-0.05    | >0.9           |
| PROMIS-29 Pain Interference                                 | 17       | 0.00        | -0.04-0.05    | 0.9            |
| PROMIS-29 Depression/Sadness                                | 17       | 0.02        | -0.03-0.07    | 0.3            |
| PROMIS-29 Physical Function                                 | 17       | -0.02       | -0.08-0.04    | 0.4            |
| PROMIS-29 Ability to Participate in Social Roles/Activities | 17       | -0.02       | -0.08-0.03    | 0.4            |
| PROMIS-29 Fatigue                                           | 17       | 0.00        | -0.03-0.04    | 0.8            |
| PROMIS-29 Anxiety                                           | 17       | -0.01       | -0.07-0.04    | 0.5            |
| PROMIS-29 Sleep Disturbance                                 | 17       | 0.00        | -0.04-0.04    | 0.9            |
